# Supplementary material for: Automated Electronic Health Record to Electronic Data Capture Transfer in Clinical Studies in the German Health Care System: Feasibility Study and Gap Analysis
Source: PubMed Central journal article supplement (PMC10439471; doi:10.2196/47958), 2023-08-04
Supplement: jmir_v25i1e47958_app1.pdf [file jmir_v25i1e47958_app1.pdf]

## Multimedia Appendix – Comorbidities by ICD-10 codes:

### Acute Coronary Syndrome

| <b>ICD-10</b> | <b>ICD-10 Decode</b>                                             |
|---------------|------------------------------------------------------------------|
| I24           | Other acute ischemic heart diseases                              |
| I24.0         | Acute coronary thrombosis not resulting in myocardial infarction |
| I24.1         | Dressler's syndrome                                              |
| I24.8         | Other forms of acute ischemic heart disease                      |
| I24.9         | Acute ischemic heart disease, unspecified                        |
| I20           | Angina pectoris                                                  |
| I20.0         | Unstable angina                                                  |
| I20.1         | Angina pectoris with documented spasm                            |
| I20.2         | Refractory angina pectoris                                       |
| I20.8         | Other forms of angina pectoris                                   |
| I20.9         | Angina pectoris, unspecified                                     |

### Alcohol consumption

| <b>ICD-10</b> | <b>ICD-10 Decode</b>                                                           |
|---------------|--------------------------------------------------------------------------------|
| F10.2         | Alcohol dependence                                                             |
| F10.20        | Alcohol dependence, uncomplicated                                              |
| F10.21        | Alcohol dependence, in remission                                               |
| F10.22        | Alcohol dependence with intoxication                                           |
| F10.22        | Alcohol dependence with intoxication, uncomplicated                            |
| F10.221       | Alcohol dependence with intoxication delirium                                  |
| F10.229       | Alcohol dependence with intoxication, unspecified                              |
| F10.23        | Alcohol dependence with withdrawal                                             |
| F10.230       | Alcohol dependence with withdrawal, uncomplicated                              |
| F10.230       | Alcohol dependence with withdrawal delirium                                    |
| F10.232       | Alcohol dependence with withdrawal with perceptual disturbance                 |
| F10.239       | Alcohol dependence with withdrawal, unspecified                                |
| F10.24        | Alcohol dependence with alcohol-induced mood disorder                          |
| F10.25        | Alcohol dependence with alcohol-induced psychotic disorder                     |
| F10.250       | Alcohol dependence with alcohol-induced psychotic disorder with delusions      |
| F10.251       | Alcohol dependence with alcohol-induced psychotic disorder with hallucinations |
| F10.259       | Alcohol dependence with alcohol-induced psychotic disorder, unspecified        |
| F10.26        | Alcohol dependence with alcohol-induced persisting amnesic disorder            |
| F10.27        | Alcohol dependence with alcohol-induced persisting dementia                    |
| F10.28        | Alcohol dependence with other alcohol-induced disorders                        |
| F10.280       | Alcohol dependence with alcohol-induced anxiety disorder                       |
| F10.281       | Alcohol dependence with alcohol-induced sexual dysfunction                     |

F10.282 Alcohol dependence with alcohol-induced sleep disorder  
F10.288 Alcohol dependence with other alcohol-induced disorder  
F10.29 Alcohol dependence with unspecified alcohol-induced disorder  
F10.90 Alcohol use, unspecified, uncomplicated  
F10.91 Alcohol use, unspecified, in remission  
F10.92 Alcohol use, unspecified with intoxication  
F10.920 Alcohol use, unspecified with intoxication, uncomplicated  
F10.921 Alcohol use, unspecified with intoxication delirium  
F10.929 Alcohol use, unspecified with intoxication, unspecified  
F10.93 Alcohol use, unspecified with withdrawal  
F10.930 Alcohol use, unspecified with withdrawal, uncomplicated  
F10.931 Alcohol use, unspecified with withdrawal delirium  
F10.932 Alcohol use, unspecified with withdrawal with perceptual disturbance  
F10.939 Alcohol use, unspecified with withdrawal, unspecified  
F10.94 Alcohol use, unspecified with alcohol-induced mood disorder  
F10.95 Alcohol use, unspecified with alcohol-induced psychotic disorder  
F10.950 Alcohol use, unspecified with alcohol-induced psychotic disorder with delusions  
F10.951 Alcohol use, unspecified with alcohol-induced psychotic disorder with hallucinations  
F10.959 Alcohol use, unspecified with alcohol-induced psychotic disorder, unspecified  
F10.96 Alcohol use, unspecified with alcohol-induced persisting amnestic disorder  
F10.97 Alcohol use, unspecified with alcohol-induced persisting dementia  
F10.98 Alcohol use, unspecified with other alcohol-induced disorders  
F10.980 Alcohol use, unspecified with alcohol-induced anxiety disorder  
F10.981 Alcohol use, unspecified with alcohol-induced sexual dysfunction  
F10.982 Alcohol use, unspecified with alcohol-induced sleep disorder  
F10.988 Alcohol use, unspecified with other alcohol-induced disorder  
F10.99 Alcohol use, unspecified with unspecified alcohol-induced disorder  
Z71.41 Alcohol abuse counseling and surveillance of alcoholic  
K70 Alcoholic liver disease  
K70.0 Alcoholic fatty liver  
K70.1 Alcoholic hepatitis  
K70.10 Alcoholic hepatitis without ascites  
K70.11 Alcoholic hepatitis with ascites  
K70.2 Alcoholic fibrosis and sclerosis of liver  
K70.3 Alcoholic cirrhosis of liver  
K70.30 Alcoholic cirrhosis of liver without ascites  
K70.31 Alcoholic cirrhosis of liver with ascites  
K70.4 Alcoholic hepatic failure  
K70.40 Alcoholic hepatic failure without coma  
K70.41 Alcoholic hepatic failure with coma  
K70.9 Alcoholic liver disease, unspecified  
G31.2 Degeneration of nervous system due to alcohol

|        |                                                                  |
|--------|------------------------------------------------------------------|
| I42.6  | Alcoholic cardiomyopathy                                         |
| Z71.4  | Alcohol abuse counseling and surveillance                        |
| Z71.41 | Alcohol abuse counseling and surveillance of alcoholic           |
| Z71.42 | Counseling for family member of alcoholic                        |
| K29.2  | Alcoholic gastritis                                              |
| K29.20 | Alcoholic gastritis without bleeding                             |
| K29.21 | Alcoholic gastritis with bleeding                                |
| G72.1  | Alcoholic myopathy                                               |
| G62.1  | Alcoholic polyneuropathy                                         |
| K85.2  | Alcohol induced acute pancreatitis                               |
| K85.20 | Alcohol induced acute pancreatitis without necrosis or infection |
| K85.21 | Alcohol induced acute pancreatitis with uninfected necrosis      |
| K85.22 | Alcohol induced acute pancreatitis with infected necrosis        |
| E24.4  | Alcohol-induced pseudo-Cushing's syndrome                        |

#### **Ascites:**

| <b>ICD-10</b> | <b>ICD-10 Decode</b>                                           |
|---------------|----------------------------------------------------------------|
| R18           | Ascites                                                        |
| R18.0         | Malignant ascites                                              |
| R18.8         | Other ascites                                                  |
| R60.0         | Localized edema                                                |
| R60.9         | Edema, unspecified                                             |
| K70.31        | Alcoholic cirrhosis of liver with ascites                      |
| K70.11        | Alcoholic hepatitis with ascites                               |
| K71.51        | Toxic liver disease with chronic active hepatitis with ascites |

#### **Atrial fibrillation:**

| <b>ICD-10</b> | <b>ICD-10 Decode</b>                     |
|---------------|------------------------------------------|
| I48.0         | Paroxysmal atrial fibrillation           |
| I48.1         | Persistent atrial fibrillation           |
| I48.2         | Chronic atrial fibrillation              |
| I48.20        | Chronic atrial fibrillation, unspecified |
| I48.21        | Permanent atrial fibrillation            |
| I48.91        | Unspecified atrial fibrillation          |

#### **Cardiogenic shock:**

| <b>ICD-10</b> | <b>ICD-10 Decode</b>             |
|---------------|----------------------------------|
| R57.0         | Cardiogenic shock                |
| T81.11        | Postprocedural cardiogenic shock |
| R57.1         | Hypovolemic shock                |

R57.8 Other shock  
R57.9 Shock, unspecified

### Chronic heart failure

| <b>ICD-10</b> | <b>ICD-10 Decode</b>                                        |
|---------------|-------------------------------------------------------------|
| I50.-         | Heart failure                                               |
| I50.0-        | Congestive heart failure                                    |
| I50.00        | Primary congestive heart failure                            |
| I50.01        | Secondary congestive heart failure                          |
| I50.02!       | Congestive heart failure, asymptomatic                      |
| I50.03!       | Congestive heart failure with symptoms under severe strain  |
| I50.04!       | Congestive heart failure with symptoms under mild strain    |
| I50.05!       | Congestive heart failure with symptoms at rest              |
| I50.1-        | Left ventricular failure, unspecified                       |
| I50.11        | Left ventricular failure: Asymptomatic                      |
| I50.12        | Left ventricular failure: With symptoms under severe strain |
| I50.13        | Left ventricular failure: With symptoms under mild strain   |
| I50.14        | Left ventricular failure: With symptoms at rest             |
| I50.19        | Left ventricular failure: Unspecified                       |
| I50.9         | Heart failure, unspecified                                  |

### Chronic kidney disease (CKD):

| <b>ICD-10</b> | <b>ICD-10 Decode</b>                                                                                                                                       |
|---------------|------------------------------------------------------------------------------------------------------------------------------------------------------------|
| E09.29        | Drug or chemical induced diabetes mellitus with other diabetic kidney complication                                                                         |
| E08.2         | Diabetes mellitus due to underlying condition with kidney complications                                                                                    |
| E08.21        | Diabetes mellitus due to underlying condition with diabetic nephropathy                                                                                    |
| E08.22        | Diabetes mellitus due to underlying condition with diabetic chronic kidney disease                                                                         |
| E08.29        | Diabetes mellitus due to underlying condition with other diabetic kidney complication                                                                      |
| E13.2         | Other specified diabetes mellitus with kidney complications                                                                                                |
| E13.21        | Other specified diabetes mellitus with diabetic nephropathy                                                                                                |
| E13.22        | Other specified diabetes mellitus with diabetic chronic kidney disease                                                                                     |
| E13.29        | Other specified diabetes mellitus with other diabetic kidney complication                                                                                  |
| E11.2         | Type 2 diabetes mellitus with kidney complications                                                                                                         |
| E11.21        | Type 2 diabetes mellitus with diabetic nephropathy                                                                                                         |
| E11.22        | Type 2 diabetes mellitus with diabetic chronic kidney disease                                                                                              |
| E11.29        | Type 2 diabetes mellitus with other diabetic kidney complication                                                                                           |
| I13           | Hypertensive heart and chronic kidney disease                                                                                                              |
| I13.0         | Hypertensive heart and chronic kidney disease with heart failure and stage 1 through stage 4 chronic kidney disease, or unspecified chronic kidney disease |
| I13.1         | Hypertensive heart and chronic kidney disease without heart failure                                                                                        |

|        |                                                                                                                                                                 |
|--------|-----------------------------------------------------------------------------------------------------------------------------------------------------------------|
| I13.10 | Hypertensive heart and chronic kidney disease without heart failure, with stage 1 through stage 4 chronic kidney disease, or unspecified chronic kidney disease |
| I13.11 | Hypertensive heart and chronic kidney disease without heart failure, with stage 5 chronic kidney disease, or end stage renal disease                            |
| I13.2  | Hypertensive heart and chronic kidney disease with heart failure and with stage 5 chronic kidney disease, or end stage renal disease                            |
| I12    | Hypertensive chronic kidney disease                                                                                                                             |
| I12.0  | Hypertensive chronic kidney disease with stage 5 chronic kidney disease or end stage renal disease                                                              |
| I12.9  | Hypertensive chronic kidney disease with stage 1 through stage 4 chronic kidney disease, or unspecified chronic kidney disease                                  |

### Cigarette smoking

| <b>ICD-10</b> | <b>ICD-10 Decode</b>                                                                    |
|---------------|-----------------------------------------------------------------------------------------|
| Z72.0         | Tobacco use                                                                             |
| F17.2         | Nicotine dependence                                                                     |
| F17.20        | Nicotine dependence, unspecified                                                        |
| F17.200       | Nicotine dependence, unspecified, uncomplicated                                         |
| F17.201       | Nicotine dependence, unspecified, in remission                                          |
| F17.203       | Nicotine dependence unspecified, with withdrawal                                        |
| F17.208       | Nicotine dependence, unspecified, with other nicotine-induced disorders                 |
| F17.209       | Nicotine dependence, unspecified, with unspecified nicotine-induced disorders           |
| F17.21        | Nicotine dependence, cigarettes                                                         |
| F17.210       | Nicotine dependence, cigarettes, uncomplicated                                          |
| F17.211       | Nicotine dependence, cigarettes, in remission                                           |
| F17.213       | Nicotine dependence, cigarettes, with withdrawal                                        |
| F17.218       | Nicotine dependence, cigarettes, with other nicotine-induced disorders                  |
| F17.219       | Nicotine dependence, cigarettes, with unspecified nicotine-induced disorders            |
| F17.29        | Nicotine dependence, other tobacco product                                              |
| F17.290       | Nicotine dependence, other tobacco product, uncomplicated                               |
| F17.291       | Nicotine dependence, other tobacco product, in remission                                |
| F17.293       | Nicotine dependence, other tobacco product, with withdrawal                             |
| F17.298       | Nicotine dependence, other tobacco product, with other nicotine-induced disorders       |
| F17.299       | Nicotine dependence, other tobacco product, with unspecified nicotine-induced disorders |
| Z87.891       | Personal history of nicotine dependence                                                 |
| Z81.2         | Family history of tobacco abuse and dependence                                          |
| Z71.6         | Tobacco abuse counseling                                                                |

### Claudication:

| <b>ICD-10</b> | <b>ICD-10 Decode</b> |
|---------------|----------------------|
|---------------|----------------------|

- I70.2 Atherosclerosis of native arteries of the extremities
- I70.20 Unspecified atherosclerosis of native arteries of extremities
- I70.201 Unspecified atherosclerosis of native arteries of extremities, right leg
- I70.202 Unspecified atherosclerosis of native arteries of extremities, left leg
- I70.203 Unspecified atherosclerosis of native arteries of extremities, bilateral legs
- I70.208 Unspecified atherosclerosis of native arteries of extremities, other extremity
- I70.209 Unspecified atherosclerosis of native arteries of extremities, unspecified extremity
- I70.21 Atherosclerosis of native arteries of extremities with intermittent claudication
- I70.211 Atherosclerosis of native arteries of extremities with intermittent claudication, right leg
- I70.212 Atherosclerosis of native arteries of extremities with intermittent claudication, left leg
- I70.213 Atherosclerosis of native arteries of extremities with intermittent claudication, bilateral legs
- I70.218 Atherosclerosis of native arteries of extremities with intermittent claudication, other extremity
- I70.219 Atherosclerosis of native arteries of extremities with intermittent claudication, unspecified extremity
- I70.29 Other atherosclerosis of native arteries of extremities
- I70.291 Other atherosclerosis of native arteries of extremities, right leg
- I70.292 Other atherosclerosis of native arteries of extremities, left leg
- I70.293 Other atherosclerosis of native arteries of extremities, bilateral legs
- I70.298 Other atherosclerosis of native arteries of extremities, other extremity
- I70.299 Other atherosclerosis of native arteries of extremities, unspecified extremity
- I70.8 Atherosclerosis of other arteries
- I70.9 Other and unspecified atherosclerosis
- I70.90 Unspecified atherosclerosis
- I70.91 Generalized atherosclerosis
- I70.92 Chronic total occlusion of artery of the extremities

**Diabetes mellitus Type 2:**

| <b>ICD-10</b> | <b>ICD-10 Decode</b>                                              |
|---------------|-------------------------------------------------------------------|
| E11           | Type 2 diabetes mellitus                                          |
| E11.0         | Type 2 diabetes mellitus with hyperosmolarity                     |
| E11.01        | Type 2 diabetes mellitus with hyperosmolarity with coma           |
| E11.1         | Type 2 diabetes mellitus with ketoacidosis                        |
| E11.11        | Type 2 diabetes mellitus with ketoacidosis with coma              |
| E11.2         | Type 2 diabetes mellitus with kidney complications                |
| E11.20        | Type 2 diabetes mellitus with renal complications Controlled      |
| E11.21        | Type 2 diabetes mellitus with diabetic nephropathy                |
| E11.3         | Type 2 diabetes mellitus with ophthalmic complications            |
| E11.30        | Type 2 diabetes mellitus with ophthalmic complications Controlled |
| E11.31        | Type 2 diabetes mellitus with unspecified diabetic retinopathy    |
| E11.4         | Type 2 diabetes mellitus with neurological complications          |

|        |                                                                                                      |
|--------|------------------------------------------------------------------------------------------------------|
| E11.40 | Type 2 diabetes mellitus with diabetic neuropathy, unspecified                                       |
| E11.41 | Type 2 diabetes mellitus with diabetic mononeuropathy                                                |
| E11.5  | Type 2 diabetes mellitus with circulatory complications                                              |
| E11.50 | Type 2 diabetes mellitus with peripheral circulatory complications Controlled                        |
| E11.51 | Type 2 diabetes mellitus with diabetic peripheral angiopathy without gangrene                        |
| E11.6  | Type 2 diabetes mellitus with other specified complications                                          |
| E11.60 | Type 2 diabetes mellitus with other specified complications Controlled                               |
| E11.61 | Type 2 diabetes mellitus with diabetic arthropathy                                                   |
| E11.7  | Type 2 diabetes mellitus with multiple complications                                                 |
| E11.72 | Type 2 diabetes mellitus with multiple complications with other multiple complications, controlled   |
| E11.73 | Type 2 diabetes mellitus with multiple complications with other multiple complications, uncontrolled |
| E11.74 | Type 2 diabetes mellitus with multiple complications with diabetic foot syndrome, controlled         |
| E11.75 | Type 2 diabetes mellitus with multiple complications with diabetic foot syndrome, uncontrolled       |
| E11.8  | Type 2 diabetes mellitus with unspecified complications                                              |
| E11.80 | Type 2 diabetes mellitus with unspecified complications Controlled                                   |
| E11.81 | Type 2 diabetes mellitus with unspecified complications Uncontrolled                                 |
| E11.9  | Type 2 diabetes mellitus without complications                                                       |
| E11.90 | Type 2 diabetes mellitus without complications Controlled                                            |
| E11.91 | Type 2 diabetes mellitus without complications Uncontrolled                                          |

**Diabetic retinopathy:**

| <b>ICD-10</b> | <b>ICD-10 Decode</b>                                                         |
|---------------|------------------------------------------------------------------------------|
| H36.0*        | Diabetic retinopathy                                                         |
| E11.31        | Type 2 diabetes mellitus with unspecified diabetic retinopathy               |
| E11.32        | Type 2 diabetes mellitus with mild nonproliferative diabetic retinopathy     |
| E11.33        | Type 2 diabetes mellitus with moderate nonproliferative diabetic retinopathy |
| E11.34        | Type 2 diabetes mellitus with severe nonproliferative diabetic retinopathy   |
| E11.35        | Type 2 diabetes mellitus with proliferative diabetic retinopathy             |

**Dyspnea:**

| <b>ICD-10</b> | <b>ICD-10 Decode</b>   |
|---------------|------------------------|
| R06.0         | Dyspnea                |
| R06.00        | Dyspnea, unspecified   |
| R06.01        | Orthopnea              |
| R06.02        | Shortness of breath    |
| R06.09        | Other forms of dyspnea |

|        |                                                                                      |
|--------|--------------------------------------------------------------------------------------|
| R06.-  | Abnormalities of breathing                                                           |
| R06.2  | Wheezing                                                                             |
| R06.3  | Periodic breathing                                                                   |
| R06.5  | Mouth breathing                                                                      |
| R06.8- | Other abnormalities of breathing                                                     |
| R06.88 | Other and unspecified abnormalities of breathing                                     |
| R07.1  | Chest pain on breathing                                                              |
| R09.-  | Other symptoms and signs involving the circulatory and respiratory system            |
| R09.8  | Other specified symptoms and signs involving the circulatory and respiratory systems |

**Fatigue:**

| <b>ICD-10</b> | <b>ICD-10 Decode</b>         |
|---------------|------------------------------|
| R53.1         | Weakness                     |
| R53.82        | Chronic fatigue, unspecified |
| R53.83        | Other fatigue                |

**Hyperkalemia:**

| <b>ICD-10</b> | <b>ICD-10 Decode</b> |
|---------------|----------------------|
| E87.6         | Hyperkalaemia        |

**Hypertension:**

| <b>ICD-10</b> | <b>ICD-10 Decode</b>                                                        |
|---------------|-----------------------------------------------------------------------------|
| I15.80        | Other secondary hypertension Without mention of hypertensive urgency        |
| I15.81        | Other secondary hypertension With mention of hypertensive urgency           |
| I15.9         | Secondary hypertension, unspecified                                         |
| I15.90        | Secondary hypertension, unspecified Without mention of hypertensive urgency |
| I15.91        | Secondary hypertension, unspecified With mention of hypertensive urgency    |

**Limb ischemia:**

| <b>ICD-10</b> | <b>ICD-10 Decode</b>                                                                 |
|---------------|--------------------------------------------------------------------------------------|
| I70.2         | Atherosclerosis of native arteries of the extremities                                |
| I70.20        | Unspecified atherosclerosis of native arteries of extremities                        |
| I70.201       | Unspecified atherosclerosis of native arteries of extremities, right leg             |
| I70.202       | Unspecified atherosclerosis of native arteries of extremities, left leg              |
| I70.203       | Unspecified atherosclerosis of native arteries of extremities, bilateral legs        |
| I70.208       | Unspecified atherosclerosis of native arteries of extremities, other extremity       |
| I70.209       | Unspecified atherosclerosis of native arteries of extremities, unspecified extremity |



|         |                                                                                         |
|---------|-----------------------------------------------------------------------------------------|
| I70.29  | Other atherosclerosis of native arteries of extremities                                 |
| I70.291 | Other atherosclerosis of native arteries of extremities, right leg                      |
| I70.292 | Other atherosclerosis of native arteries of extremities, left leg                       |
| I70.293 | Other atherosclerosis of native arteries of extremities, bilateral legs                 |
| I70.298 | Other atherosclerosis of native arteries of extremities, other extremity                |
| I70.299 | Other atherosclerosis of native arteries of extremities, unspecified extremity          |
| I70.8   | Atherosclerosis of other arteries                                                       |
| I70.9   | Other and unspecified atherosclerosis                                                   |
| I70.90  | Unspecified atherosclerosis                                                             |
| I70.91  | Generalized atherosclerosis                                                             |
| I70.92  | Chronic total occlusion of artery of the extremities                                    |
| I70.22  | Atherosclerosis of native arteries of extremities with rest pain                        |
| I70.221 | Atherosclerosis of native arteries of extremities with rest pain, right leg             |
| I70.222 | Atherosclerosis of native arteries of extremities with rest pain, left leg              |
| I70.223 | Atherosclerosis of native arteries of extremities with rest pain, bilateral legs        |
| I70.228 | Atherosclerosis of native arteries of extremities with rest pain, other extremity       |
| I70.229 | Atherosclerosis of native arteries of extremities with rest pain, unspecified extremity |
| I70.26  | Atherosclerosis of native arteries of extremities with gangrene                         |
| I70.261 | Atherosclerosis of native arteries of extremities with gangrene, right leg              |
| I70.262 | Atherosclerosis of native arteries of extremities with gangrene, left leg               |
| I70.263 | Atherosclerosis of native arteries of extremities with gangrene, bilateral legs         |
| I70.268 | Atherosclerosis of native arteries of extremities with gangrene, other extremity        |
| I70.269 | Atherosclerosis of native arteries of extremities with gangrene, unspecified extremity  |

#### **Myocardial infarction:**

| <b>ICD-10</b> | <b>ICD-10 Decode</b>                                                                                                    |
|---------------|-------------------------------------------------------------------------------------------------------------------------|
| I23.0         | Hemopericardium as current complication following acute myocardial infarction                                           |
| I23.1         | Atrial septal defect as current complication following acute myocardial infarction                                      |
| I23.2         | Ventricular septal defect as current complication following acute myocardial infarction                                 |
| I23.3         | Rupture of cardiac wall without hemopericardium as current complication following acute myocardial infarction           |
| I23.4         | Rupture of chordae tendineae as current complication following acute myocardial infarction                              |
| I23.5         | Rupture of papillary muscle as current complication following acute myocardial infarction                               |
| I23.6         | Thrombosis of atrium, auricular appendage, and ventricle as current complications following acute myocardial infarction |
| I23.7         | Postinfarction angina                                                                                                   |
| I23.8         | Other current complications following acute myocardial infarction                                                       |
| I25.2         | Old myocardial infarction                                                                                               |
| I25.20        | Old myocardial infarction: 29 days to under 4 months previously                                                         |

|        |                                                              |
|--------|--------------------------------------------------------------|
| I25.21 | Old myocardial infarction: 4 days to under 1 year previously |
| I25.22 | Old myocardial infarction: 1 year or more previously         |
| I25.29 | Old myocardial infarction: Unspecified                       |
| I25.5  | Ischemic cardiomyopathy                                      |
| I25.6  | Silent myocardial ischemia                                   |
| I25.83 | Coronary atherosclerosis due to lipid rich plaque            |
| I25.84 | Coronary atherosclerosis due to calcified coronary lesion    |
| I25.89 | Other forms of chronic ischemic heart disease                |
| I25.9  | Chronic ischemic heart disease, unspecified                  |
| Z03.4  | Observation for suspected myocardial infarction              |

**Peripheral edema:**

| <b>ICD-10</b> | <b>ICD-10 Decode</b> |
|---------------|----------------------|
| R60.0         | Localized edema      |
| R60.1         | Generalized edema    |
| R60.9         | Edema, unspecified   |

**Pleural effusion:**

| <b>ICD-10</b> | <b>ICD-10 Decode</b>                                      |
|---------------|-----------------------------------------------------------|
| J90           | Pleural effusion, not elsewhere classified                |
| J91           | Pleural effusion in conditions classified elsewhere       |
| J91.0         | Malignant pleural effusion                                |
| J91.8         | Pleural effusion in other conditions classified elsewhere |
| J94.0         | Chylous effusion                                          |
| J94.9         | Pleural condition, unspecified                            |

**Pregnancy:**

| <b>ICD-10</b> | <b>ICD-10 Decode</b>                                                  |
|---------------|-----------------------------------------------------------------------|
| Z30           | Encounter for contraceptive management                                |
| Z32           | Encounter for pregnancy test and childbirth and childcare instruction |
| Z33!          | Pregnant state                                                        |
| Z34           | Encounter for supervision of normal pregnancy                         |

**Sepsis:**

| <b>ICD 10</b> | <b>ICD 10 Decode</b> |
|---------------|----------------------|
| A02.1         | Salmonella sepsis    |

|        |                                                       |
|--------|-------------------------------------------------------|
| A20.7  | Septicaemic plague                                    |
| A21.7  | Generalized tularaemia                                |
| A22.7  | Anthrax sepsis                                        |
| A26.7  | Erysipelothrix sepsis                                 |
| A32.7  | Listerial sepsis                                      |
| A39.2  | Acute meningococcaemia                                |
| A39.3  | Chronic meningococcaemia                              |
| A39.4  | Meningococcaemia, unspecified                         |
| A40    | Streptococcal sepsis                                  |
| A40.0  | Sepsis due to streptococcus, group A                  |
| A40.1  | Sepsis due to streptococcus, group B                  |
| A40.2  | Sepsis due to streptococcus, group D and enterococcus |
| A40.3  | Sepsis due to Streptococcus pneumoniae                |
| A40.8  | Other streptococcal sepsis                            |
| A40.9  | Streptococcal sepsis, unspecified                     |
| A41    | Other sepsis                                          |
| A41.0  | Sepsis due to Staphylococcus aureus                   |
| A41.1  | Sepsis due to other specified staphylococcus          |
| A41.2  | Sepsis due to unspecified staphylococcus              |
| A41.3  | Sepsis due to Haemophilus influenzae                  |
| A41.4  | Sepsis due to anaerobes                               |
| A41.5  | Sepsis due to other Gram-negative organisms           |
| A41.51 | Sepsis: Escherichia coli [E. coli]                    |
| A41.52 | Sepsis: Pseudomonas                                   |
| A41.58 | Sepsis: Other gramnegative pathogen                   |
| A41.8  | Other specified sepsis                                |
| A41.9  | Sepsis, unspecified                                   |
| A42.7  | Actinomycotic sepsis                                  |
| A48.3  | Toxic shock syndrome                                  |
| B00.70 | Herpesviral sepsis                                    |
| B37.7  | Candidal sepsis                                       |
| B38.70 | Disseminated coccidioidomycosis                       |
| B39.30 | Disseminated histoplasmosis capsulati                 |
| B40.70 | Disseminated blastomycosis                            |
| B41.70 | Disseminated paracoccidioidomycosis                   |
| B42.70 | Disseminated sporotrichosis                           |
| B44.70 | Disseminated aspergillosis                            |
| B45.70 | Disseminated cryptococcosis                           |
| B46.40 | Disseminated mucormycosis                             |
| B48.80 | Lobomycosis                                           |
| B58.90 | Toxoplasmosis, unspecified                            |
| B60.80 | Other specified protozoal diseases                    |

|        |                                                                                                                        |
|--------|------------------------------------------------------------------------------------------------------------------------|
| U69.8  | Secondary code numbers specifying the temporal relationship of sepsis and septic shock to inpatient hospital admission |
| U69.80 | non-nosocomial Sepsis                                                                                                  |
| U69.81 | nosocomial Sepsis                                                                                                      |
| U69.82 | Sepsis of unclear time of onset related to hospital admission                                                          |
| R57.2  | Septic shock                                                                                                           |

**Stroke:**

| <b>ICD-10</b> | <b>ICD-10 Decode</b>                                                                             |
|---------------|--------------------------------------------------------------------------------------------------|
| I63           | Cerebral infarction                                                                              |
| I63.0         | Cerebral infarction due to thrombosis of precerebral arteries                                    |
| I63.00        | Cerebral infarction due to thrombosis of unspecified precerebral artery                          |
| I63.01        | Cerebral infarction due to thrombosis of vertebral artery                                        |
| I63.011       | Cerebral infarction due to thrombosis of right vertebral artery                                  |
| I63.012       | Cerebral infarction due to thrombosis of left vertebral artery                                   |
| I63.013       | Cerebral infarction due to thrombosis of bilateral vertebral arteries                            |
| I63.019       | Cerebral infarction due to thrombosis of unspecified vertebral artery                            |
| I63.02        | Cerebral infarction due to thrombosis of basilar artery                                          |
| I63.03        | Cerebral infarction due to thrombosis of carotid artery                                          |
| I63.031       | Cerebral infarction due to thrombosis of right carotid artery                                    |
| I63.032       | Cerebral infarction due to thrombosis of left carotid artery                                     |
| I63.033       | Cerebral infarction due to thrombosis of bilateral carotid arteries                              |
| I63.039       | Cerebral infarction due to thrombosis of unspecified carotid artery                              |
| I63.09        | Cerebral infarction due to thrombosis of other precerebral artery                                |
| I63.1         | Cerebral infarction due to embolism of precerebral arteries                                      |
| I63.10        | Cerebral infarction due to embolism of unspecified precerebral artery                            |
| I63.11        | Cerebral infarction due to embolism of vertebral artery                                          |
| I63.111       | Cerebral infarction due to embolism of right vertebral artery                                    |
| I63.112       | Cerebral infarction due to embolism of left vertebral artery                                     |
| I63.113       | Cerebral infarction due to embolism of bilateral vertebral arteries                              |
| I63.119       | Cerebral infarction due to embolism of unspecified vertebral artery                              |
| I63.12        | Cerebral infarction due to embolism of basilar artery                                            |
| I63.13        | Cerebral infarction due to embolism of carotid artery                                            |
| I63.131       | Cerebral infarction due to embolism of right carotid artery                                      |
| I63.132       | Cerebral infarction due to embolism of left carotid artery                                       |
| I63.133       | Cerebral infarction due to embolism of bilateral carotid arteries                                |
| I63.139       | Cerebral infarction due to embolism of unspecified carotid artery                                |
| I63.19        | Cerebral infarction due to embolism of other precerebral artery                                  |
| I63.2         | Cerebral infarction due to unspecified occlusion or stenosis of precerebral arteries             |
| I63.20        | Cerebral infarction due to unspecified occlusion or stenosis of unspecified precerebral arteries |
| I63.21        | Cerebral infarction due to unspecified occlusion or stenosis of vertebral arteries               |

I63.211 Cerebral infarction due to unspecified occlusion or stenosis of right vertebral artery  
I63.212 Cerebral infarction due to unspecified occlusion or stenosis of left vertebral artery  
I63.213 Cerebral infarction due to unspecified occlusion or stenosis of bilateral vertebral arteries  
I63.219 Cerebral infarction due to unspecified occlusion or stenosis of unspecified vertebral artery  
I63.22 Cerebral infarction due to unspecified occlusion or stenosis of basilar artery  
I63.23 Cerebral infarction due to unspecified occlusion or stenosis of carotid arteries  
I63.231 Cerebral infarction due to unspecified occlusion or stenosis of right carotid arteries  
I63.232 Cerebral infarction due to unspecified occlusion or stenosis of left carotid arteries  
I63.233 Cerebral infarction due to unspecified occlusion or stenosis of bilateral carotid arteries  
I63.239 Cerebral infarction due to unspecified occlusion or stenosis of unspecified carotid artery  
I63.29 Cerebral infarction due to unspecified occlusion or stenosis of other precerebral arteries  
I63.3 Cerebral infarction due to thrombosis of cerebral arteries  
I63.30 Cerebral infarction due to thrombosis of unspecified cerebral artery  
I63.31 Cerebral infarction due to thrombosis of middle cerebral artery  
I63.311 Cerebral infarction due to thrombosis of right middle cerebral artery  
I63.312 Cerebral infarction due to thrombosis of left middle cerebral artery  
I63.313 Cerebral infarction due to thrombosis of bilateral middle cerebral arteries  
I63.319 Cerebral infarction due to thrombosis of unspecified middle cerebral artery  
I63.32 Cerebral infarction due to thrombosis of anterior cerebral artery  
I63.321 Cerebral infarction due to thrombosis of right anterior cerebral artery  
I63.322 Cerebral infarction due to thrombosis of left anterior cerebral artery  
I63.323 Cerebral infarction due to thrombosis of bilateral anterior cerebral arteries  
I63.329 Cerebral infarction due to thrombosis of unspecified anterior cerebral artery  
I63.33 Cerebral infarction due to thrombosis of posterior cerebral artery  
I63.331 Cerebral infarction due to thrombosis of right posterior cerebral artery  
I63.332 Cerebral infarction due to thrombosis of left posterior cerebral artery  
I63.333 Cerebral infarction due to thrombosis of bilateral posterior cerebral arteries  
I63.339 Cerebral infarction due to thrombosis of unspecified posterior cerebral artery  
I63.34 Cerebral infarction due to thrombosis of cerebellar artery  
I63.341 Cerebral infarction due to thrombosis of right cerebellar artery  
I63.342 Cerebral infarction due to thrombosis of left cerebellar artery  
I63.343 Cerebral infarction due to thrombosis of bilateral cerebellar arteries  
I63.349 Cerebral infarction due to thrombosis of unspecified cerebellar artery  
I63.39 Cerebral infarction due to thrombosis of other cerebral artery  
I63.4 Cerebral infarction due to embolism of cerebral arteries  
I63.40 Cerebral infarction due to embolism of unspecified cerebral artery  
I63.41 Cerebral infarction due to embolism of middle cerebral artery  
I63.411 Cerebral infarction due to embolism of right middle cerebral artery

|         |                                                                                                      |
|---------|------------------------------------------------------------------------------------------------------|
| I63.412 | Cerebral infarction due to embolism of left middle cerebral artery                                   |
| I63.413 | Cerebral infarction due to embolism of bilateral middle cerebral arteries                            |
| I63.419 | Cerebral infarction due to embolism of unspecified middle cerebral artery                            |
| I63.42  | Cerebral infarction due to embolism of anterior cerebral artery                                      |
| I63.421 | Cerebral infarction due to embolism of right anterior cerebral artery                                |
| I63.422 | Cerebral infarction due to embolism of left anterior cerebral artery                                 |
| I63.423 | Cerebral infarction due to embolism of bilateral anterior cerebral arteries                          |
| I63.429 | Cerebral infarction due to embolism of unspecified anterior cerebral artery                          |
| I63.43  | Cerebral infarction due to embolism of posterior cerebral artery                                     |
| I63.431 | Cerebral infarction due to embolism of right posterior cerebral artery                               |
| I63.432 | Cerebral infarction due to embolism of left posterior cerebral artery                                |
| I63.433 | Cerebral infarction due to embolism of bilateral posterior cerebral arteries                         |
| I63.439 | Cerebral infarction due to embolism of unspecified posterior cerebral artery                         |
| I63.44  | Cerebral infarction due to embolism of cerebellar artery                                             |
| I63.441 | Cerebral infarction due to embolism of right cerebellar artery                                       |
| I63.442 | Cerebral infarction due to embolism of left cerebellar artery                                        |
| I63.443 | Cerebral infarction due to embolism of bilateral cerebellar arteries                                 |
| I63.449 | Cerebral infarction due to embolism of unspecified cerebellar artery                                 |
| I63.49  | Cerebral infarction due to embolism of other cerebral artery                                         |
| I63.5   | Cerebral infarction due to unspecified occlusion or stenosis of cerebral arteries                    |
|         | Cerebral infarction due to unspecified occlusion or stenosis of unspecified cerebral artery          |
| I63.50  |                                                                                                      |
| I63.51  | Cerebral infarction due to unspecified occlusion or stenosis of middle cerebral artery               |
|         | Cerebral infarction due to unspecified occlusion or stenosis of right middle cerebral artery         |
| I63.511 |                                                                                                      |
|         | Cerebral infarction due to unspecified occlusion or stenosis of left middle cerebral artery          |
| I63.512 |                                                                                                      |
|         | Cerebral infarction due to unspecified occlusion or stenosis of bilateral middle cerebral arteries   |
| I63.513 |                                                                                                      |
|         | Cerebral infarction due to unspecified occlusion or stenosis of unspecified middle cerebral artery   |
| I63.519 |                                                                                                      |
|         | Cerebral infarction due to unspecified occlusion or stenosis of anterior cerebral artery             |
| I63.52  |                                                                                                      |
|         | Cerebral infarction due to unspecified occlusion or stenosis of right anterior cerebral artery       |
| I63.521 |                                                                                                      |
|         | Cerebral infarction due to unspecified occlusion or stenosis of left anterior cerebral artery        |
| I63.522 |                                                                                                      |
|         | Cerebral infarction due to unspecified occlusion or stenosis of bilateral anterior cerebral arteries |
| I63.523 |                                                                                                      |
|         | Cerebral infarction due to unspecified occlusion or stenosis of unspecified anterior cerebral artery |
| I63.529 |                                                                                                      |
|         | Cerebral infarction due to unspecified occlusion or stenosis of posterior cerebral artery            |
| I63.53  |                                                                                                      |

|         |                                                                                                        |
|---------|--------------------------------------------------------------------------------------------------------|
| I63.531 | Cerebral infarction due to unspecified occlusion or stenosis of right posterior cerebral artery        |
| I63.532 | Cerebral infarction due to unspecified occlusion or stenosis of left posterior cerebral artery         |
| I63.533 | Cerebral infarction due to unspecified occlusion or stenosis of bilateral posterior cerebral arteries  |
| I63.539 | Cerebral infarction due to unspecified occlusion or stenosis of unspecified posterior cerebral artery  |
| I63.54  | Cerebral infarction due to unspecified occlusion or stenosis of cerebellar artery                      |
| I63.541 | Cerebral infarction due to unspecified occlusion or stenosis of right cerebellar artery                |
| I63.542 | Cerebral infarction due to unspecified occlusion or stenosis of left cerebellar artery                 |
| I63.543 | Cerebral infarction due to unspecified occlusion or stenosis of bilateral cerebellar arteries          |
| I63.549 | Cerebral infarction due to unspecified occlusion or stenosis of unspecified cerebellar artery          |
| I63.59  | Cerebral infarction due to unspecified occlusion or stenosis of other cerebral artery                  |
| I63.6   | Cerebral infarction due to cerebral venous thrombosis, nonpyogenic                                     |
| I63.8   | Other cerebral infarction                                                                              |
| I63.81  | Other cerebral infarction due to occlusion or stenosis of small artery                                 |
| I63.89  | Other cerebral infarction                                                                              |
| I63.9   | Cerebral infarction, unspecified                                                                       |
| G46.3   | Brain stem stroke syndrome                                                                             |
| G46.4   | Cerebellar stroke syndrome                                                                             |
| G46.5   | Pure motor lacunar syndrome                                                                            |
| G46.6   | Pure sensory lacunar syndrome                                                                          |
| G46.7   | Other lacunar syndromes                                                                                |
| I69     | Sequelae of cerebrovascular disease                                                                    |
| I69.30  | Unspecified sequelae of cerebral infarction                                                            |
| I61     | Nontraumatic intracerebral hemorrhage                                                                  |
| I61.0   | Nontraumatic intracerebral hemorrhage in hemisphere, subcortical                                       |
| I61.1   | Nontraumatic intracerebral hemorrhage in hemisphere, cortical                                          |
| I61.2   | Nontraumatic intracerebral hemorrhage in hemisphere, unspecified                                       |
| I61.3   | Nontraumatic intracerebral hemorrhage in brain stem                                                    |
| I61.4   | Nontraumatic intracerebral hemorrhage in cerebellum                                                    |
| I61.5   | Nontraumatic intracerebral hemorrhage, intraventricular                                                |
| I61.6   | Nontraumatic intracerebral hemorrhage, multiple localized                                              |
| I61.8   | Other nontraumatic intracerebral hemorrhage                                                            |
| I61.9   | Nontraumatic intracerebral hemorrhage, unspecified                                                     |
| I62     | Other and unspecified nontraumatic intracranial hemorrhage                                             |
| Z86.73  | Personal history of transient ischemic attack (TIA), and cerebral infarction without residual deficits |
| R29.7   | National Institutes of Health Stroke Scale (NIHSS) score                                               |

## Supraventricular tachycardia

| ICD-10 | ICD-10 Decode                |
|--------|------------------------------|
| I47.1  | Supraventricular tachycardia |

## Transient ischemic attack (TIA)

|        |                                                                                            |
|--------|--------------------------------------------------------------------------------------------|
| G45    | Transient cerebral ischemic attacks and related syndromes                                  |
| G45.0  | Vertebro-basilar artery syndrome                                                           |
| G45.1  | Carotid artery syndrome (hemispheric)                                                      |
| G45.2  | Multiple and bilateral precerebral artery syndromes                                        |
| G45.3  | Amaurosis fugax                                                                            |
| G45.4  | Transient global amnesia                                                                   |
| G45.8  | Other transient cerebral ischemic attacks and related syndromes                            |
| G45.9  | Transient cerebral ischemic attack, unspecified                                            |
| G45.92 | Transient cerebral ischaemic attack, unspecified Complete remission after 1 to 24 hours    |
| G45.93 | Transient cerebral ischaemic attack, unspecified Complete remission after less than 1 hour |
| G45.99 | Transient cerebral ischaemic attack, unspecified Course of remission unspecified           |

## Ulcers of extremities

| ICD-10  | ICD-10 Decode                                                                        |
|---------|--------------------------------------------------------------------------------------|
| I70.202 | Unspecified atherosclerosis of native arteries of extremities, left leg              |
| I70.203 | Unspecified atherosclerosis of native arteries of extremities, bilateral legs        |
| I70.208 | Unspecified atherosclerosis of native arteries of extremities, other extremity       |
| I70.209 | Unspecified atherosclerosis of native arteries of extremities, unspecified extremity |
| I70.29  | Other atherosclerosis of native arteries of extremities                              |
| I70.291 | Other atherosclerosis of native arteries of extremities, right leg                   |
| I70.292 | Other atherosclerosis of native arteries of extremities, left leg                    |
| I70.293 | Other atherosclerosis of native arteries of extremities, bilateral legs              |
| I70.298 | Other atherosclerosis of native arteries of extremities, other extremity             |
| I70.299 | Other atherosclerosis of native arteries of extremities, unspecified extremity       |
| I70.8   | Atherosclerosis of other arteries                                                    |
| I70.9   | Other and unspecified atherosclerosis                                                |
| I70.90  | Unspecified atherosclerosis                                                          |
| I70.91  | Generalized atherosclerosis                                                          |
| I70.92  | Chronic total occlusion of artery of the extremities                                 |
| I70.23  | Atherosclerosis of native arteries of right leg with ulceration                      |
| I70.231 | Atherosclerosis of native arteries of right leg with ulceration of thigh             |
| I70.232 | Atherosclerosis of native arteries of right leg with ulceration of calf              |
| I70.233 | Atherosclerosis of native arteries of right leg with ulceration of ankle             |



|         |                                                                                            |
|---------|--------------------------------------------------------------------------------------------|
| I70.234 | Atherosclerosis of native arteries of right leg with ulceration of heel and midfoot        |
| I70.235 | Atherosclerosis of native arteries of right leg with ulceration of other part of foot      |
| I70.238 | Atherosclerosis of native arteries of right leg with ulceration of other part of lower leg |
| I70.239 | Atherosclerosis of native arteries of right leg with ulceration of unspecified site        |
| I70.24  | Atherosclerosis of native arteries of left leg with ulceration                             |
| I70.241 | Atherosclerosis of native arteries of left leg with ulceration of thigh                    |
| I70.242 | Atherosclerosis of native arteries of left leg with ulceration of calf                     |
| I70.243 | Atherosclerosis of native arteries of left leg with ulceration of ankle                    |
| I70.244 | Atherosclerosis of native arteries of left leg with ulceration of heel and midfoot         |
| I70.245 | Atherosclerosis of native arteries of left leg with ulceration of other part of foot       |
| I70.248 | Atherosclerosis of native arteries of left leg with ulceration of other part of lower leg  |
| I70.249 | Atherosclerosis of native arteries of left leg with ulceration of unspecified site         |
| I70.25  | Atherosclerosis of native arteries of other extremities with ulceration                    |
| L97     | Non-pressure chronic ulcer of lower limb, not elsewhere classified                         |
| I83.0   | Varicose veins of lower extremities with ulcer                                             |
| I83.2   | Varicose veins of lower extremities with both ulcer and inflammation                       |
| I87.01  | Postthrombotic syndrome with ulcer                                                         |

**Urinary tract infection:**

| <b>ICD-10</b> | <b>ICD-10 Decode</b>                        |
|---------------|---------------------------------------------|
| N39.0         | Urinary tract infection, site not specified |
